# Supplementary material
Source: publisher site journal article supplement (https://www.dovepress.com/article/392036)
Supplement: Supplementary file 1 [file get_supplementary_file.php]

*Supplementary Material*


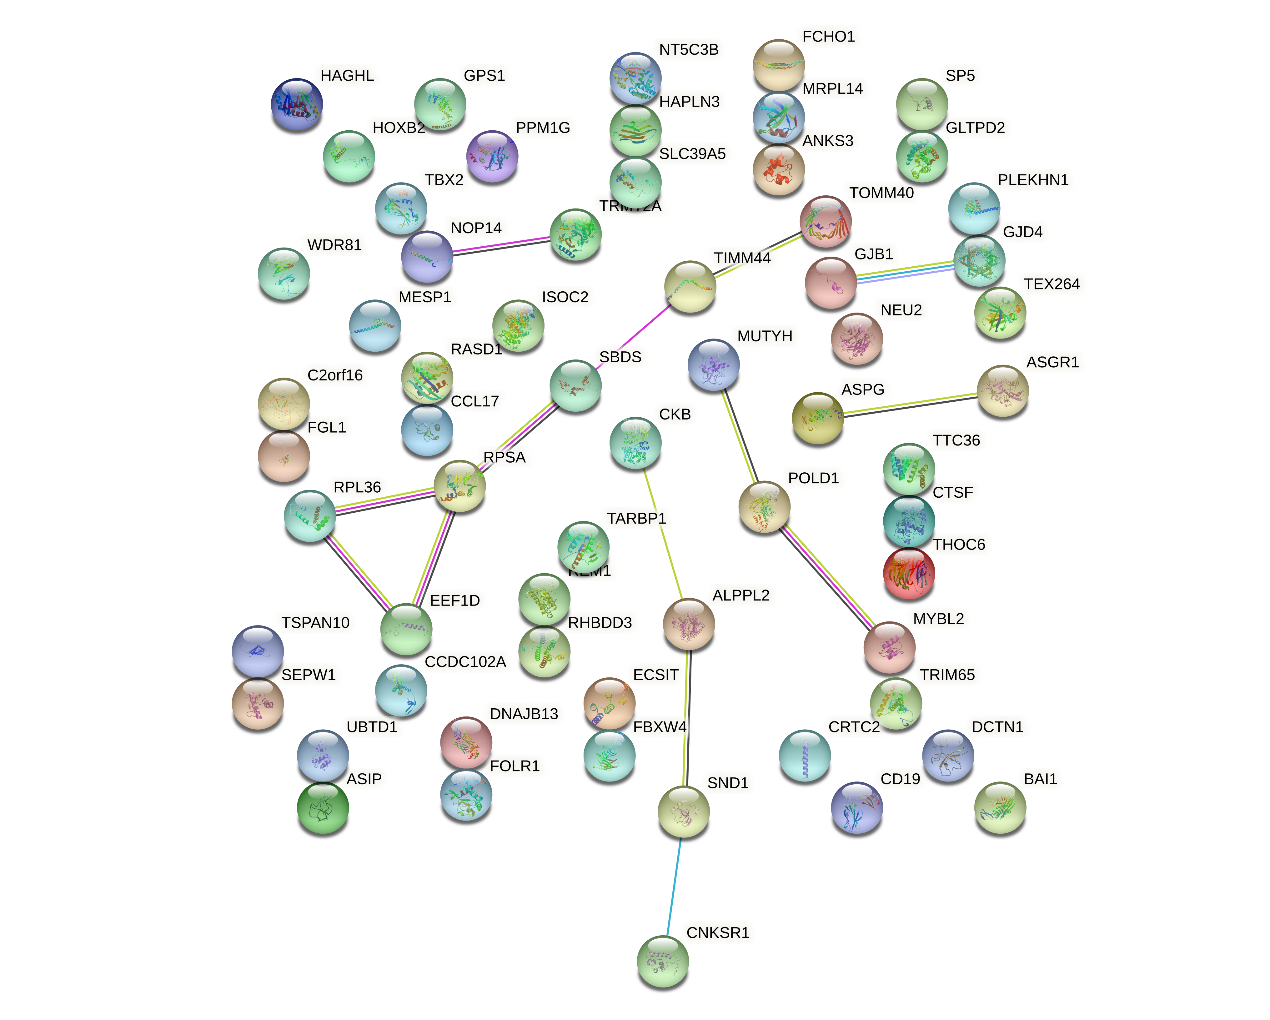


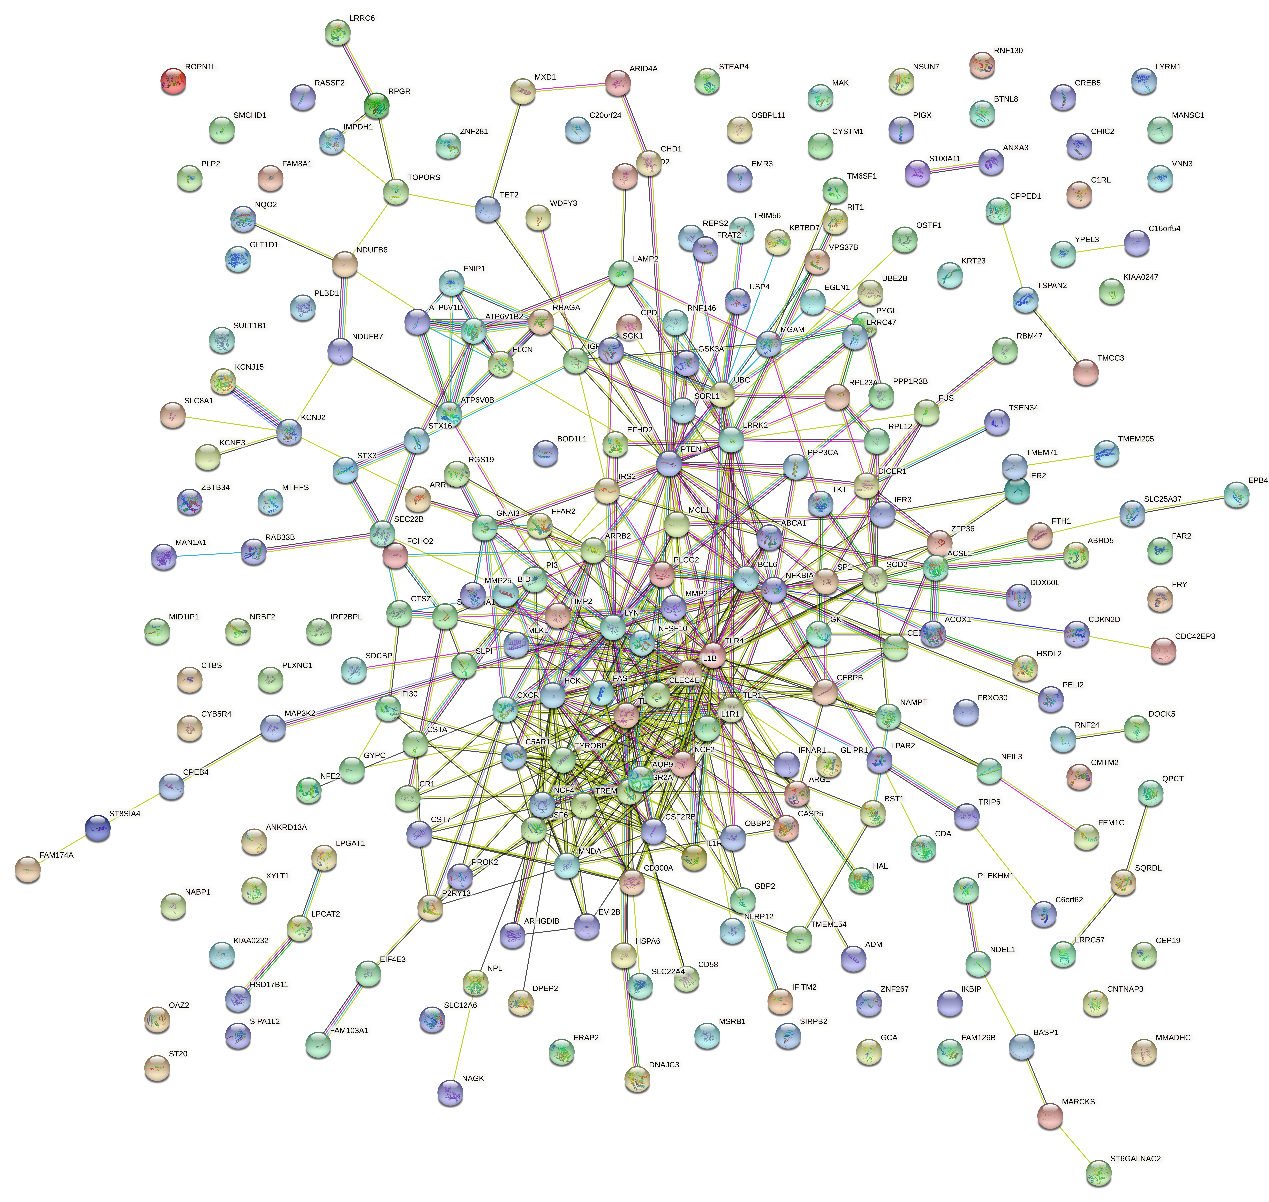


**Supplementary Figure 1**. Protein-protein interaction network.

In the whole PPI protein interaction network system, the filling nodes in the image indicated that the three-dimensional structure of the protein was known or predicted, while the empty nodes indicated that the three-dimensional structure of the protein was unknown. The connections between proteins represent the functional connections between proteins. There are seven different colored lines :1. The color of evidence supported by database is light blue; 2. The color that has been proved in the experiment is purple; 3. Red is a fusion of two genes. 4. Yellow-green represents the evidence extracted from the article; 5. Green represents two genetic similarities; 6. Blue represents gene cogeneration; And 7. Black indicates gene co-expression. The network diagram of up-regulated genes in patients with restenosis is shown above, and the network diagram of down-regulated genes in patients with restenosis is shown below.

**Supplementary Table 1.** Basic clinical patient information.

Gender, age, diagnosis, hypertension, diabetes,white blood cell, neutrophil, glucose and prothrombin time were ordered listed in this table.

| Characteristic | Restenosis (24) | Non-restenosis (14) | P-value |
| --- | --- | --- | --- |
| Age, y | 61.13 ± 2.479 | 49.14 ± 3.083 | 0.005 |
| Gender, M/F | 7/17 | 7/7 |  |
| Total cholesterol (mmol/L) | 3.686 ± 0.2089 | 4.358 ± 0.2712 | 0.0612 |
| Triglycerides (mmol/L) | 1.554 ± 0.1749 | 1.612 ± 0.1894 | 0.0732 |
| LDL (mmol/L) | 2.108 ± 0.1931 | 2.633 ± 0.1971 | 0.0323 |
| D-dimer (ng/ml) | 99.58 ± 14.82 | 218.4 ± 55.47 | 0.1299 |
| Fibrinogen (g/L) | 2.896 ± 0.1076 | 2.586 ± 0.1398 | 0.0918 |
| APTT (sec) | 39.97 ± 6.141 | 34.46 ± 0.6567 | 0.7124 |
| PT (sec) | 10.92 ± 0.1187 | 12.78 ± 0.9420 | 0.1291 |
| Platelets (×109/L) | 217.4 ± 11.76 | 212.9 ± 13.34 | 0.8123 |
| Leukocytes (×109/L) | 5.265 ± 0.4752 | 4.292 ± 0.3824 | 0.3245 |
| Neutrophils (%) | 68.81 ± 1.956 | 65.03 ± 3.21 | 0.2915 |
| Monocytes (%) | 3.13 ± 0.2548 | 3.815 ± 0.4672 | 0.1684 |
| Lymphocytes (%) | 25.91± 1.563 | 27.36 ± 2.356 | 0.6002 |
| Hypertension (n) | 16 | 3 |  |
| Diabetes mellitus (n) | 10 | 0 |  |
| Cigarette smoking (n) | 10 | 4 |  |

**Supplementary Table2.** Primer sequence of qRT-PCR test.

| Gene name | Species(Human) | 5’-3’ |
| --- | --- | --- |
| EEF1D | F | GACGACGCAGAAAGGAGATT |
|  | R | GCCAGGGATTTCTGGATGTT |
| RPL36 | F | TCTGACCAAACACACCAAGT |
|  | R | GTCCTTGGAGACCTTCAGTAAC |
| RPSA | F | AGGTTTGTGGAACAGTGAGG |
|  | R | GCCTGGATCTGGTTAGTGAAG |
| CTLA4 | F | GTGAACCTCACTATCCAAGGAC |
|  | R | TGCCTATGCCCAGGTAGTA |
| YTHDF2 | F | CCTCCATTGGCTTCTCCTATTC |
|  | R | GTTGCTCAGCTGTCCATAAGA |
| GLS2 | F | TGCCATCGGCTATTATCTCAAG |
|  | R | CAGAACACAGCTGGAAGTAGAG |
| β-actin | F | CTCCATCCTGGCCTCGCTGT |
|  | R | GCTGTCACCTTCACCGTTCC |
